# Supplementary material
Source: PubMed Central journal article supplement (PMC7611276)
Supplement: EMS130367-supplement-File_S2.pdf [file EMS130367-supplement-File_S2.pdf]

**ICMR - NATIONAL INSTITUTE FOR RESEARCH IN REPRODUCTIVE HEALTH**

Jehangir Merwanji Street, Parel, Mumbai-400 012

**NIRRH ETHICS COMMITTEE FOR CLINICAL STUDIES**

Tel: 91-22-24192000/2043/2147, Fax No. 91-22-24139412

E-mail: [nirrh.cliethics@gmail.com](mailto:nirrh.cliethics@gmail.com)

Recognized by: Strategic Initiative for Developing Capacity in Ethical Review (SIDCER),  
Forum for Ethics Review Committees in Asia and the Western Pacific Region (FERCAP)  
for its compliance with international and local standards in ethical review

**CHAIRPERSON**

Dr. Padmavathy Menon

**MEMBERS**

Dr. Anahita Chauhan

Dr. Renuka Munshi

Adv. Veena Johari

Dr. Sivakami Muthusamy

Dr. Y. S. Nandanwar

Dr. Sandeep Bavdekar

Mr. Ashok Upadhyay

Mrs. Aarti Tipnis

Dr. Shubada Chiplunkar

Dr. Vikrant Bhor

**MEMBER SECRETARY**

Dr. Beena Joshi

Ref.: D/ICEC/Sci-53/55/2020

4<sup>th</sup> June 2020

Dr. Rahul Gajbhiye,  
Department of Clinical Research,  
ICMR-NIRRH.

Sub. : Reference to the project entitled "National Registry of Pregnant Women with COVID-19 in India (PregCovid Study), Version 1.1, dtd. 2<sup>nd</sup> June 2020".

Project No.: 404/2020

PI: Dr. Rahul Gajbhiye

Dear Dr. Gajbhiye,

This is with reference to the study proposal Version 1, dated 20/05/2020 which was submitted to the ICMR-NIRRH Ethics Committee for Clinical Studies Secretariat on 23<sup>rd</sup> May 2020 for granting approval. The research study proposal has been reviewed through Expedited process.

The Ethics Committee acknowledges the receipt and approves the final copy of Version 1.1, dated 2<sup>nd</sup> June 2020 along with request for waiver of consent which was received on 4<sup>th</sup> June 2020.

Please note that any changes to the proposal should have prior approval by the ethics committee before being implemented.

The approval for this proposal is valid for a period of one year only.

Ethics Committee approvals of the remaining participating centers should be obtained and submitted to Ethics Secretariat office for record.

Project can be initiated only after signing of MoU between collaborating centers.

Due date for submission of continuing review report is 03/04/2021.

Sincerely,

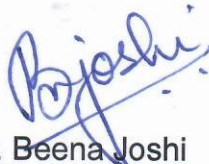

Dr. Beena Joshi  
Member Secretary



Dr. Padmavathy S. Menon  
Chairperson
